# Supplementary material for: Problematic Child Media Use During the COVID-19 Pandemic
Source: Oxford University Press journal article supplement (doi:10.1542/peds.2021-055190), 2022-08-02
Supplement: peds_2021055190supplementarydata.pdf [file peds_2021055190supplementarydata.pdf]

## Supplemental Information

**SUPPLEMENTAL TABLE 5** Linear Regression Examining Potential Modification From Parental Education on Association Between Parental Mental Health With Problematic Media Use

| Family Characteristics                           | Child Problematic Media Use     |                                  |
|--------------------------------------------------|---------------------------------|----------------------------------|
|                                                  | Age 6–10<br>B (95% CI) <i>P</i> | Age 11–17<br>B (95% CI) <i>P</i> |
| Child age                                        | 0.56 (−0.16 to 1.28) .128       | −0.07 (−0.62 to 0.47) .79        |
| Child gender                                     |                                 |                                  |
| Male                                             | (ref)                           | (ref)                            |
| Female                                           | −2.15 (−4.17 to −0.13) .038     | −0.46 (−2.51 to 1.61) .66        |
| Public insurance                                 | 1.45 (−1.03 to 3.94) .253       | −1.73 (−4.57 to 1.12) .236       |
| Parent education                                 |                                 |                                  |
| Less than high school                            | (ref)                           | (ref)                            |
| Some college                                     | −0.04 (−3.70 to 3.61) .982      | −0.51 (−5.05 to 4.03) .827       |
| 4-y degree                                       | 0.77 (−3.03 to 4.57) .69        | −2.93 (−7.03 to 1.18) .164       |
| Post-graduate degree                             | −0.98 (−5.78 to 3.83) .692      | −6.11 (−10.60 to −1.62) .009     |
| Parent employment                                |                                 |                                  |
| No parents employed                              | (ref)                           | (ref)                            |
| 1 or more parents part-time                      | —                               | —                                |
| All parents full-time                            | 1.61 (−0.47 to 3.69) .132       | 2.00 (−0.10 to 4.10) .064        |
| Parent PHQ-4 score                               | 0.63 (−0.02 to 1.27) .059       | 1.30 (0.56 to 2.03) .001         |
| Parent work from home                            |                                 |                                  |
| No                                               | (ref)                           | (ref)                            |
| Some of the time                                 | 0.25 (−2.56 to 3.07) .861       | 0.13 (−2.58 to 2.84) .924        |
| All of the time                                  | 1.67 (−0.93 to 4.27) .209       | 1.63 (−0.90 to 4.17) .208        |
| Impact of COVID-19 on parent self-care behaviors | 0.41 (−0.03 to 0.84) .069       | 0.22 (−0.25 to 0.69) 0.353       |
| School modality                                  |                                 |                                  |
| Remote                                           | (ref)                           | (ref)                            |
| Hybrid                                           | 0.88 (−1.53 to 3.29) 0.477      | 0.61 (−1.66 to 2.87) .601        |
| In-person                                        | −0.09 (−2.68 to 2.51) .947      | −2.21 (−5.37 to 0.94) .171       |
| During pandemic media rules                      | −0.30 (−0.89 to 0.30) .334      | 0.74 (−0.01 to 1.38) .025        |
| Change in screen rules from pre-pandemic         | 0.85 (−0.04 to 1.74) .062       | −0.018 (−1.26 to 1.23) .978      |
| Some college: parent PHQ-4 score                 | 0.32 (−0.58 to 1.22) .484       | −0.92 (−1.81 to −0.03) .044      |
| 4-y degree: parent PHQ-4 score                   | 0.46 (−0.57 to 1.48) .39        | −0.07 (−0.10 to 0.86) .883       |
| Post-graduate degree: parent PHQ-4 score         | 0.46 (−0.57 to 1.48) .387       | 0.85 (−0.08 to 1.78) .074        |

B, Unstandardized beta; CI, confidence interval; —, category not included in analysis.

**SUPPLEMENTAL TABLE 6** Linear Regression Examining Potential Modification From Parental Employment on Association Between Parental Mental Health With Problematic Media Use

| Family Characteristics                           | Child Problematic Media Use     |                                  |
|--------------------------------------------------|---------------------------------|----------------------------------|
|                                                  | Age 6–10<br>B (95% CI) <i>P</i> | Age 11–17<br>B (95% CI) <i>P</i> |
| Child age                                        | 0.56 (–0.15 to 1.28) .126       | –0.05 (–0.61 to 0.52) .868       |
| Child gender                                     |                                 |                                  |
| Male                                             | (ref)                           | (ref)                            |
| Female                                           | –2.11 (–4.15 to –0.08) .044     | –0.46 (–2.57 to 1.64) .667       |
| Public insurance                                 | 1.36 (–1.06 to 3.77) .273       | –2.23 (–5.13 to 0.66) .132       |
| Parent education                                 |                                 |                                  |
| Less than high school                            | (ref)                           | (ref)                            |
| Some college                                     | 0.85 (–1.96 to 3.66) .554       | –4.78 (–8.14 to –1.41) .006      |
| 4-y degree                                       | 0.79 (–2.11 to 3.68) .595       | –3.54 (–6.82 to –0.25) .036      |
| Post-graduate degree                             | 0.53 (–2.95 to 4.00) .767       | –3.26 (–6.76 to 0.24) .070       |
| Parent employment                                |                                 |                                  |
| No parents employed                              | (ref)                           | (ref)                            |
| 1 or more parents part-time                      | —                               | —                                |
| All parents full-time                            | 1.83 (–1.00 to 4.66) .208       | 2.69 (–0.40 to 5.79) .090        |
| Parent PHQ-4 score                               | 0.85 (0.28 to 1.43) .005        | 1.31 (0.69 to 1.94) <.001        |
| Parent works from home                           |                                 |                                  |
| No                                               | (ref)                           | (ref)                            |
| Some of the time                                 | 0.20 (–2.59 to 3.00) .887       | 0.02 (–2.78 to 2.81) .991        |
| All of the time                                  | 1.39 (–1.15 to 3.93) .285       | 2.64 (0.07 to 5.22) .046         |
| Impact of COVID-19 on parent self-care behaviors | 0.38 (–0.05 to 0.81) .084       | 0.13 (–0.35 to 0.61) .593        |
| School modality                                  |                                 |                                  |
| Remote                                           | (ref)                           | (ref)                            |
| Hybrid                                           | 0.66 (–1.73 to 3.05) .591       | 0.70 (–1.65 to 3.05) .561        |
| In-person                                        | –1.4 (–2.73 to 2.45) .917       | –1.95 (–5.17 to 1.27) .237       |
| During pandemic media rules                      | –0.31 (–0.90 to 0.29) .312      | 0.80 (0.14 to 1.47) .019         |
| Change in screen rules from pre-pandemic         | 0.79 (–0.09 to 1.67) .080       | 0.151 (–1.13 to 1.43) .819       |
| All parents full-time: parent PHQ-4 score        | –0.08 (–0.77 to 0.62) .823      | –0.09 (–0.79 to 0.61) .799       |

B, Unstandardized beta; CI, confidence interval; —, category not included in analysis

**SUPPLEMENTAL TABLE 7** Linear Regression Examining Potential Modification From Parental Education on Association Between COVID-19 Related Self-Care With Problematic Media Use

| Family Characteristics                           | Child Problematic Media Use  |                              |
|--------------------------------------------------|------------------------------|------------------------------|
|                                                  | Age 6–10<br>B (95% CI) P     | Age 11–17<br>B (95% CI) P    |
| Child age                                        | 0.58 (−0.13 to 1.30) .113    | −0.05 (−0.62 to 0.52) .871   |
| Child gender                                     |                              |                              |
| Male                                             | (ref)                        | (ref)                        |
| Female                                           | −2.16 (−4.16 to −0.16) .036  | −0.34 (−2.51 to 1.84) .763   |
| Public insurance                                 | 1.39 (−1.03 to 3.80) .262    | −2.04 (−4.96 to 0.88) .173   |
| Parent education                                 |                              |                              |
| Less than high school                            | (ref)                        | (ref)                        |
| Some college                                     | −7.62 (−16.38 to 1.15) .090  | −8.56 (−19.02 to 1.91) 0.111 |
| 4-y degree                                       | −1.78 (−10.45 to 6.90) .689  | −7.33 (−17.30 to 2.63) .151  |
| Post-graduate degree                             | −0.04 (−10.67 to 10.59) .995 | −6.39 (−16.21 to 3.42) .20   |
| Parent employment                                |                              |                              |
| No parents employed                              | (ref)                        | (ref)                        |
| 1 or more parents part-time                      | —                            | —                            |
| All parents full-time                            | 1.56 (−0.52 to 3.65) .143    | 2.44 (0.27 to 4.62) .029     |
| Parent PHQ-4 score                               | 0.80 (0.44 to 1.16) <.001    | 1.25 (0.92 to 1.58) <.001    |
| Parent work from home                            |                              |                              |
| No                                               | (ref)                        | (ref)                        |
| Some of the time                                 | 0.27 (−2.52 to 3.06) .851    | 0.15 (−2.67 to 2.96) .919    |
| All of the time                                  | 1.50 (−1.01, 4.02) 0.243     | 2.61 (0.03 to 5.20) .050     |
| Impact of COVID-19 on parent self-care behaviors | −0.05 (−0.87 to 0.76) .903   | −0.25 (−1.20 to 0.70) .608   |
| School modality                                  |                              |                              |
| Remote                                           | (ref)                        | (ref)                        |
| Hybrid                                           | 0.73 (−1.64 to 3.10) .548    | 0.67 (−1.71 to 3.04) .583    |
| In-person                                        | −0.30 (−2.90 to 2.30) .821   | −2.02 (−5.29 to 1.25) .229   |
| During pandemic media rules                      | −0.34 (−0.93 to 0.25) .265   | 0.850 (0.17 to 1.53) .015    |
| Change in screen rules from prepandemic          | 0.75 (−0.15, to1.64) .103    | 0.16 (−1.13 to 1.46) .806    |
| Some college: parent self-care behaviors         | 1.08 (0.01 to 2.15) .050     | 0.53 (−0.80 to 1.86) .806    |
| 4-y college: parent self-care behaviors          | 0.35 (−0.74 to 1.43) .530    | 0.53 (−0.76 to 1.82) .420    |
| Post-graduate degree: parent self-care behaviors | 0.09 (−1.24 to 1.42) .898    | 0.45 (−0.92 to 1.83) .518    |

B, unstandardized beta; CI, confidence interval; —, category not included in analysis.
